# Supplementary material for: Calpain Mediated Proteolysis of Junctophilin-1 Produces an Aggregation Prone C-Terminal Fragment in Skeletal Muscle
Source: Research Square preprint supplement (doi:10.21203/rs.3.rs-8663093/v1), 2026-02-03
Supplement: Supplementary file 1 [file 26c087135439cc3d22dafe52.docx]

**Uncropped blots**

**Dotted blue box indicates the cropped regions of blots used in original manuscript**

**Figure 1**

**Pane C**


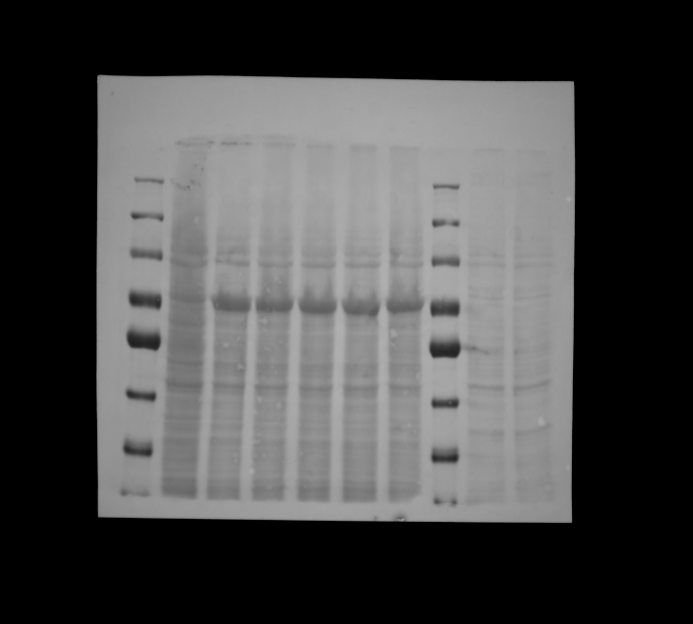
 GFP Ponceau Stain


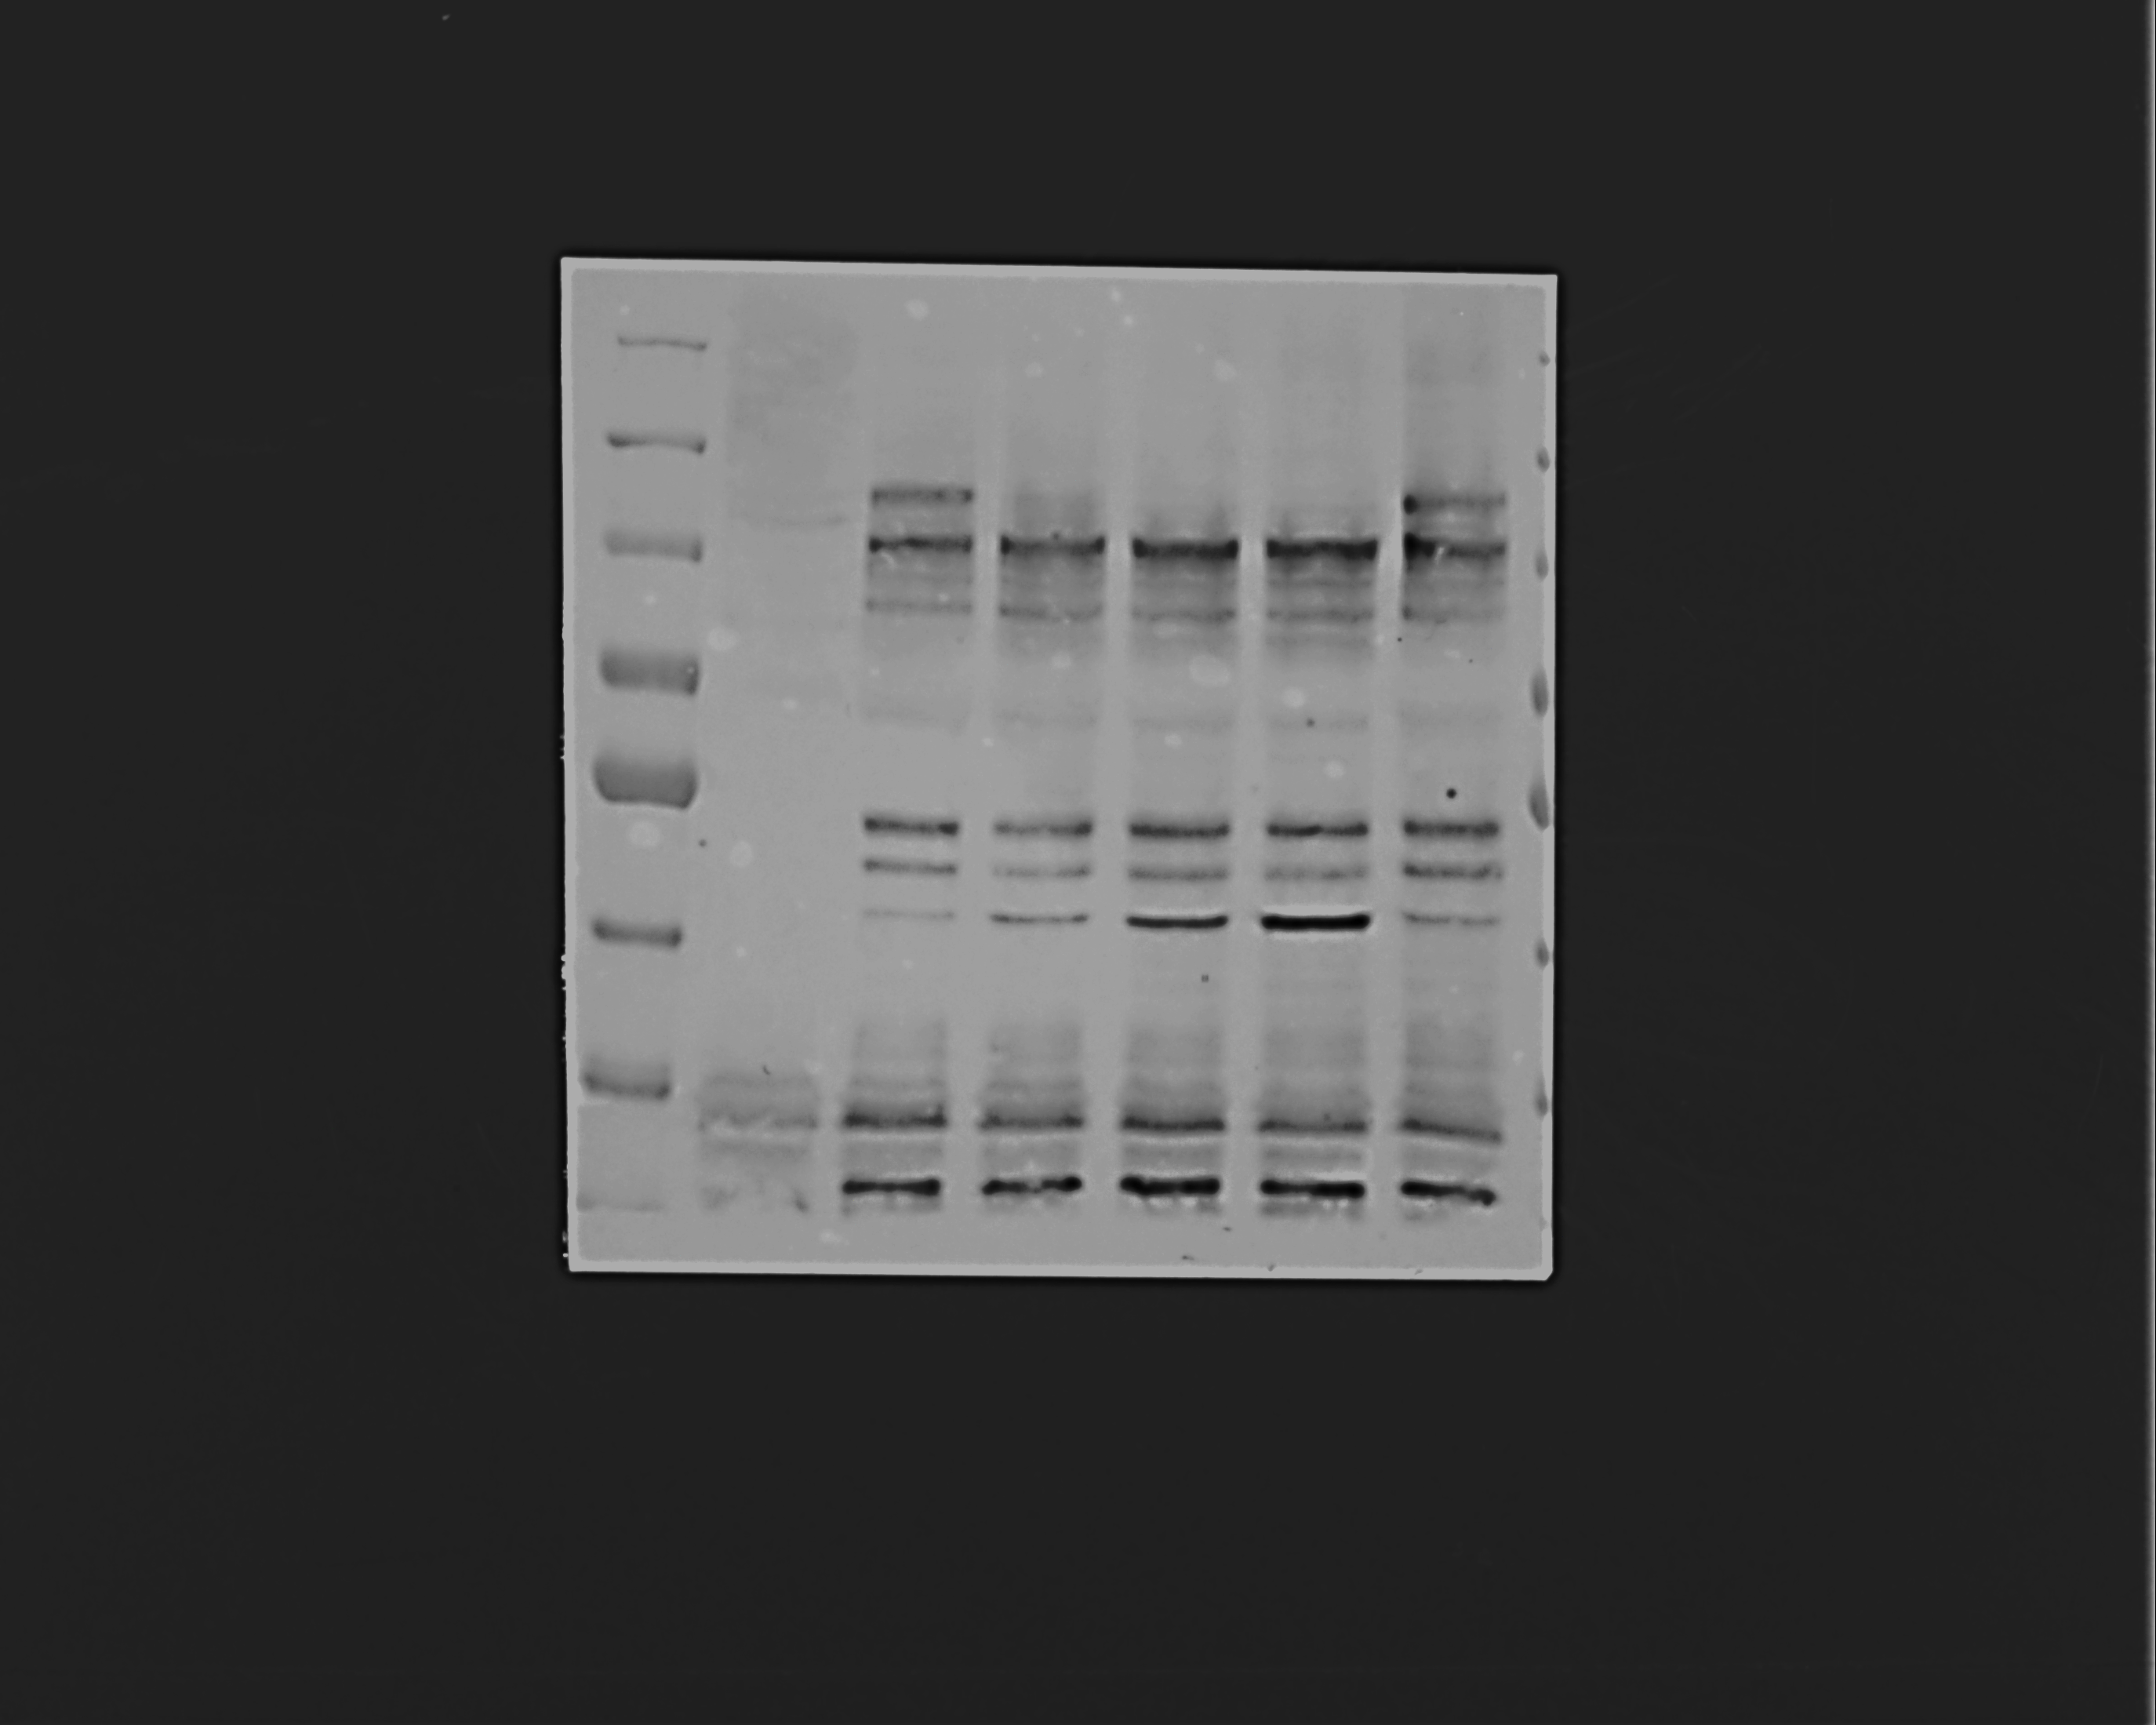


**Panel D**

**
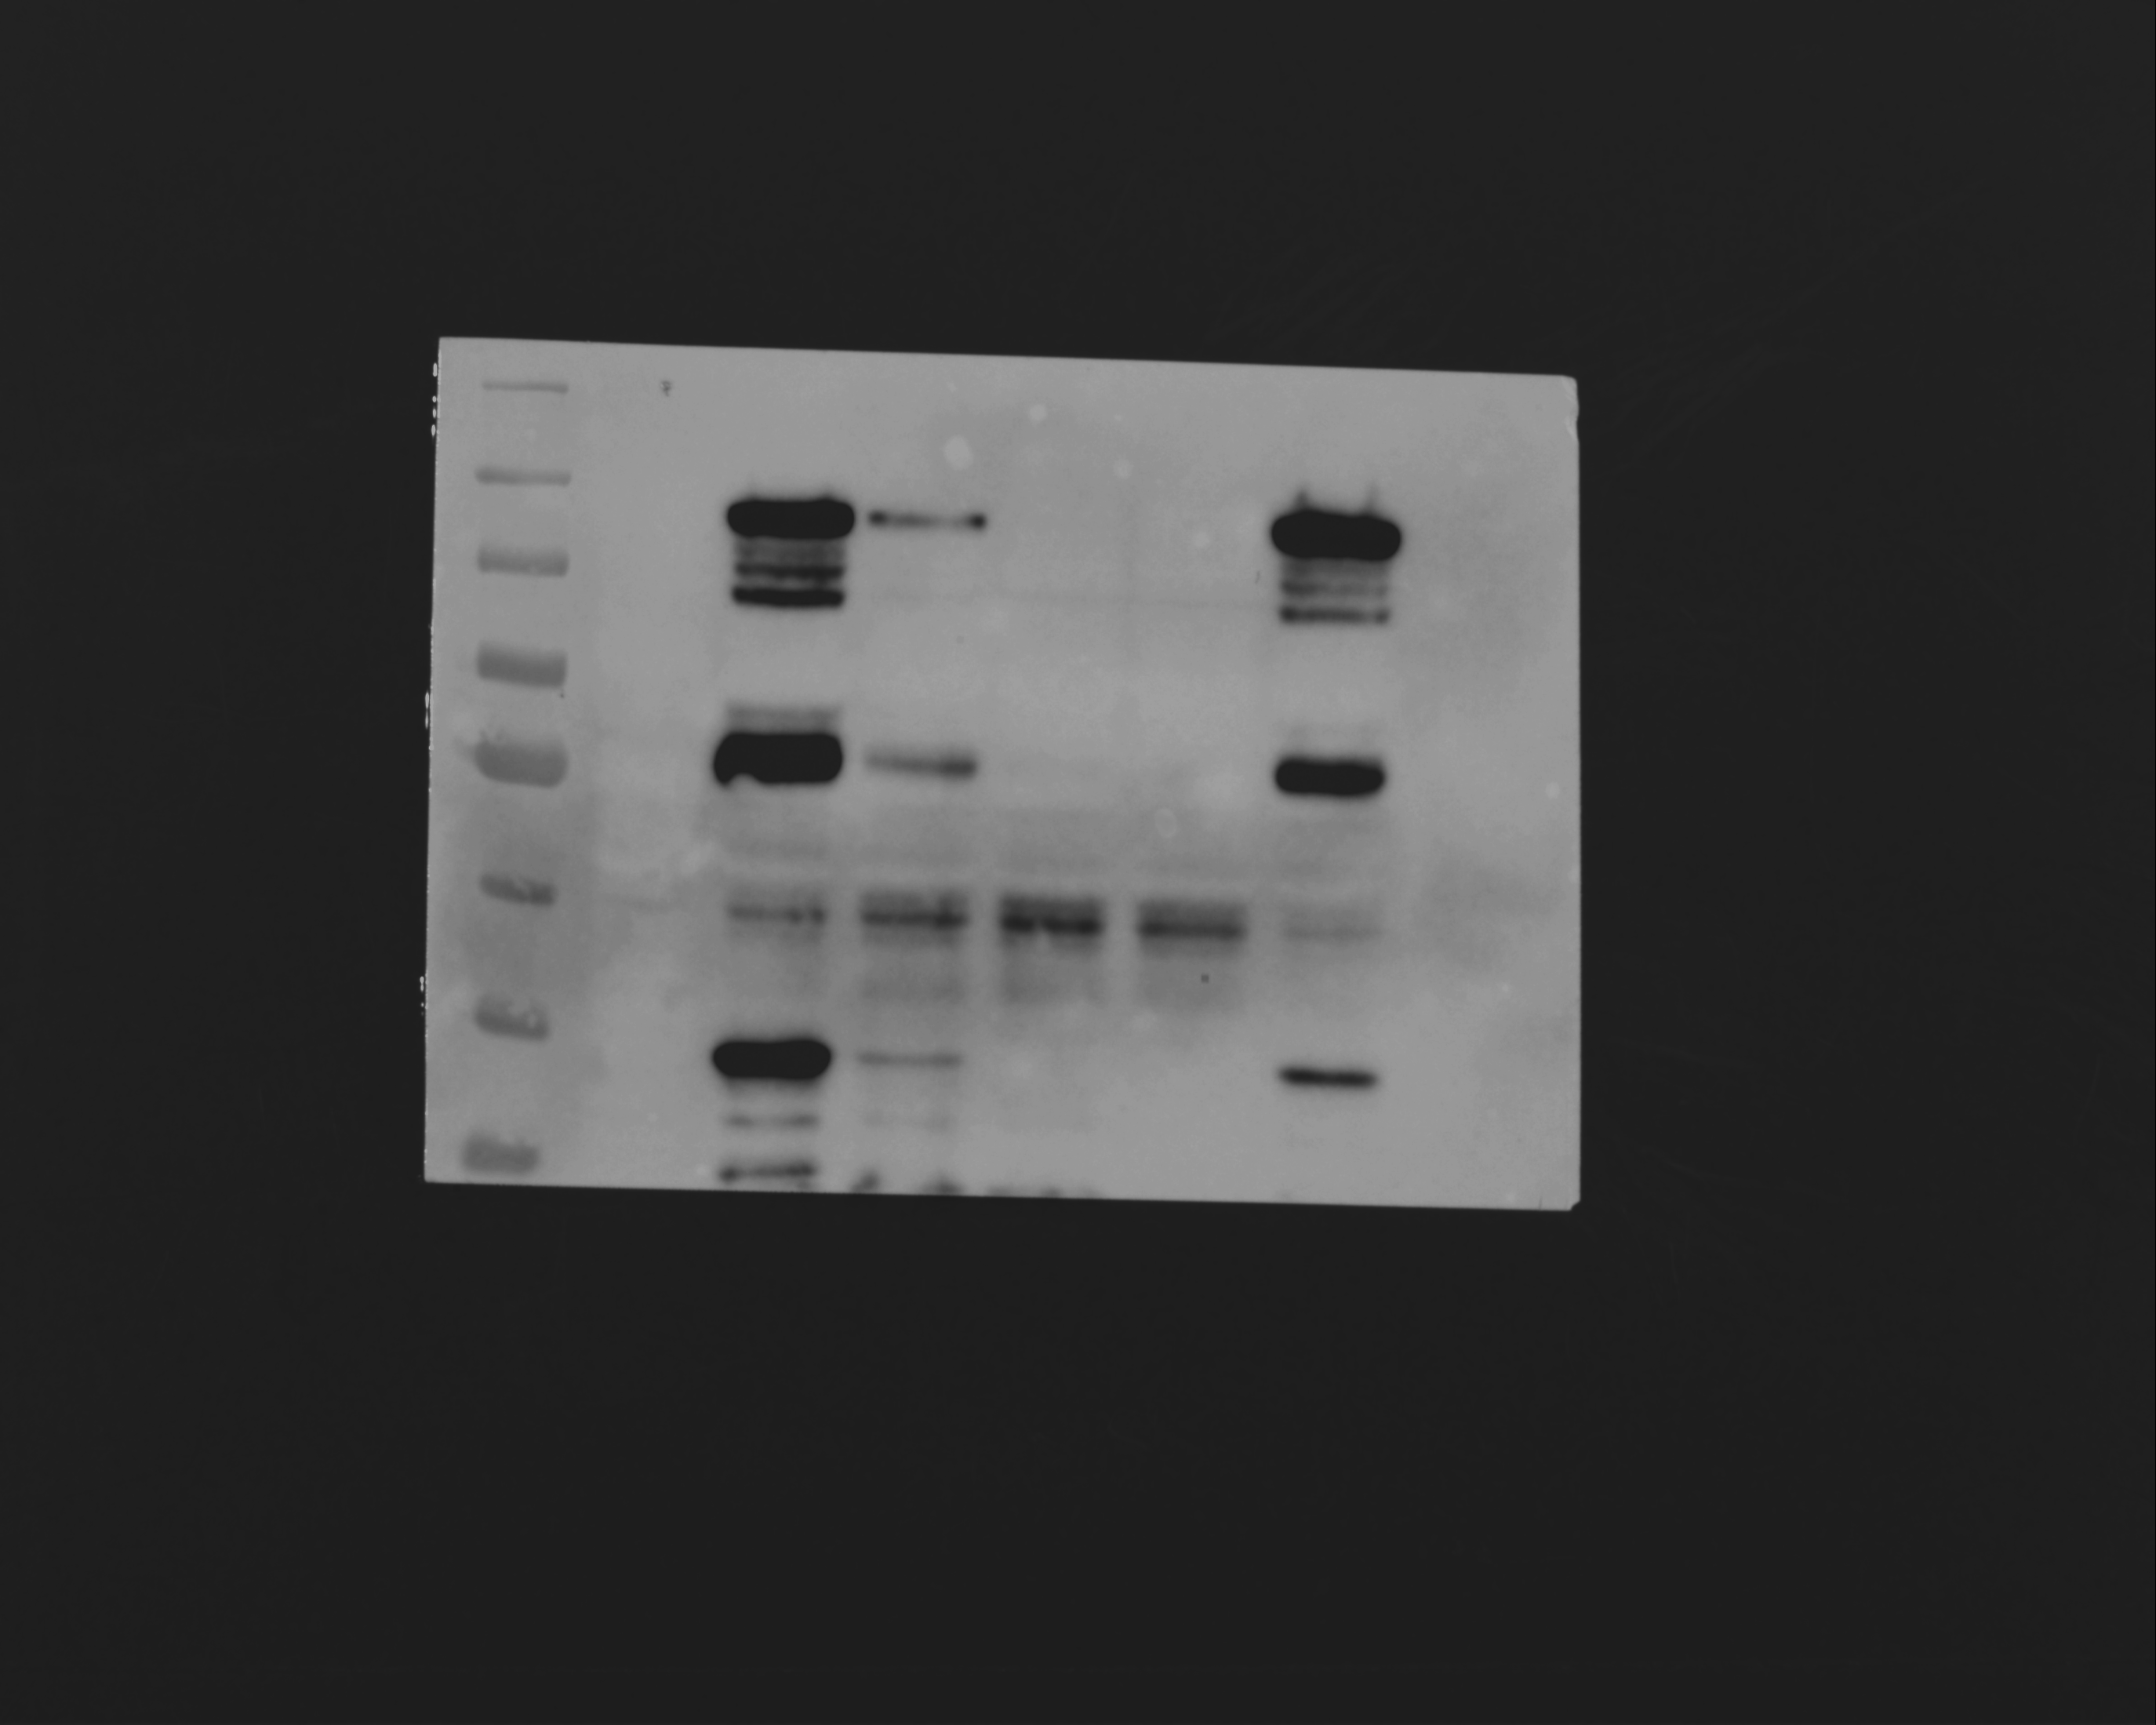
** FLAG Ponceau Stain


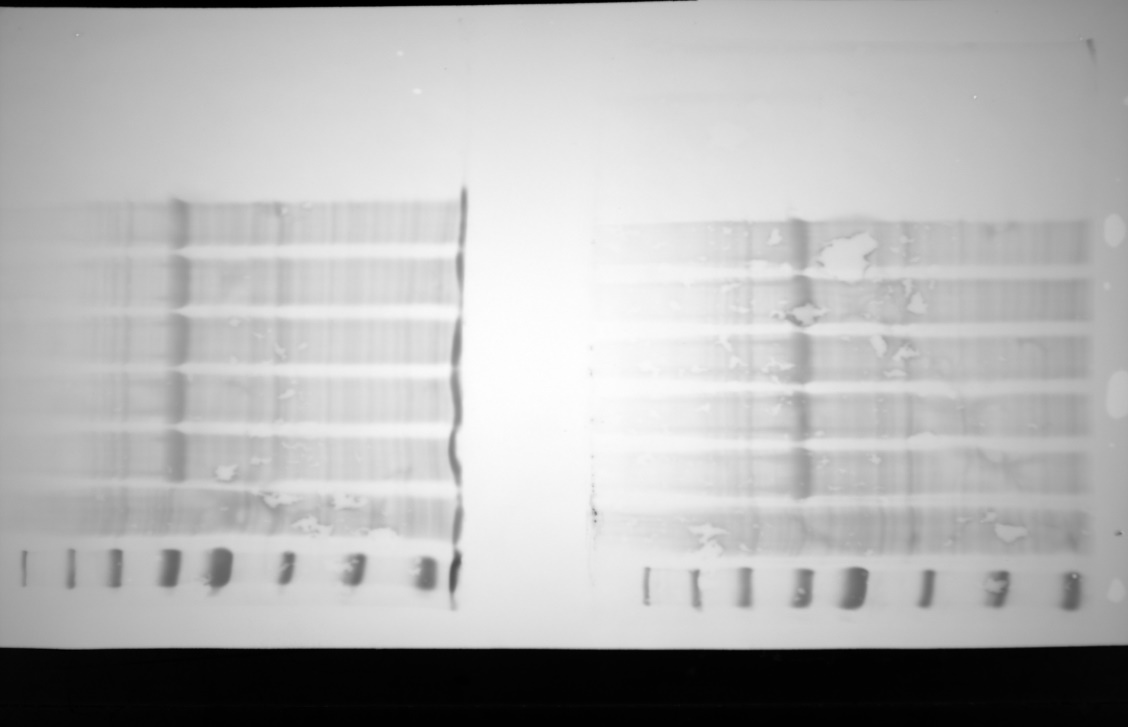


**Figure 3**

**Panel D
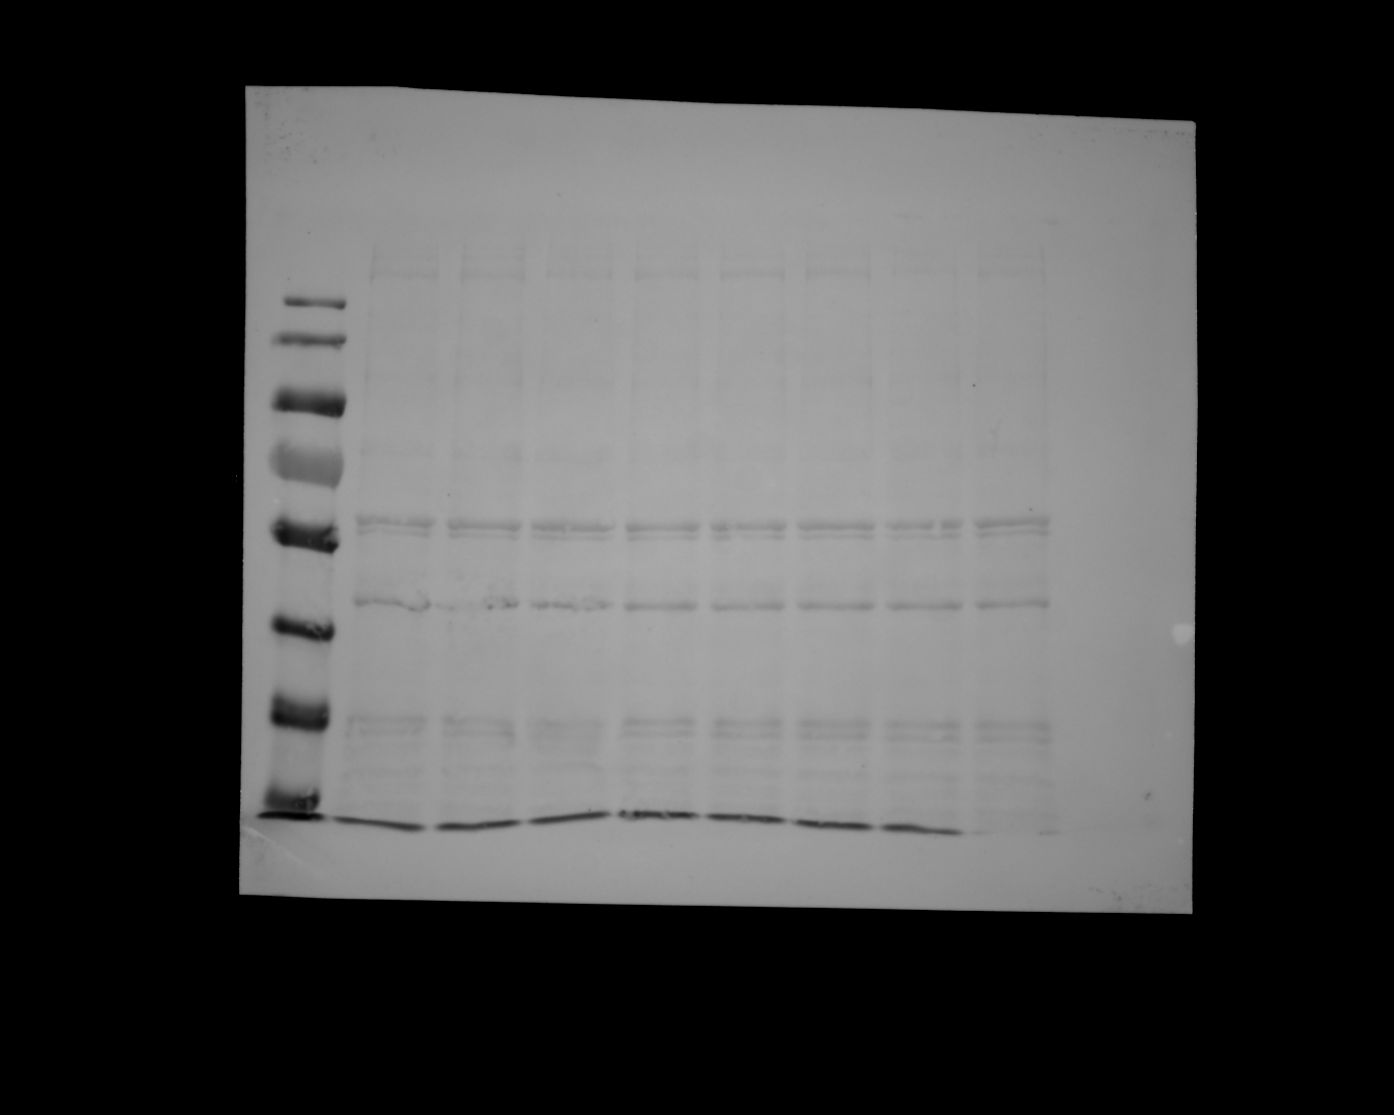

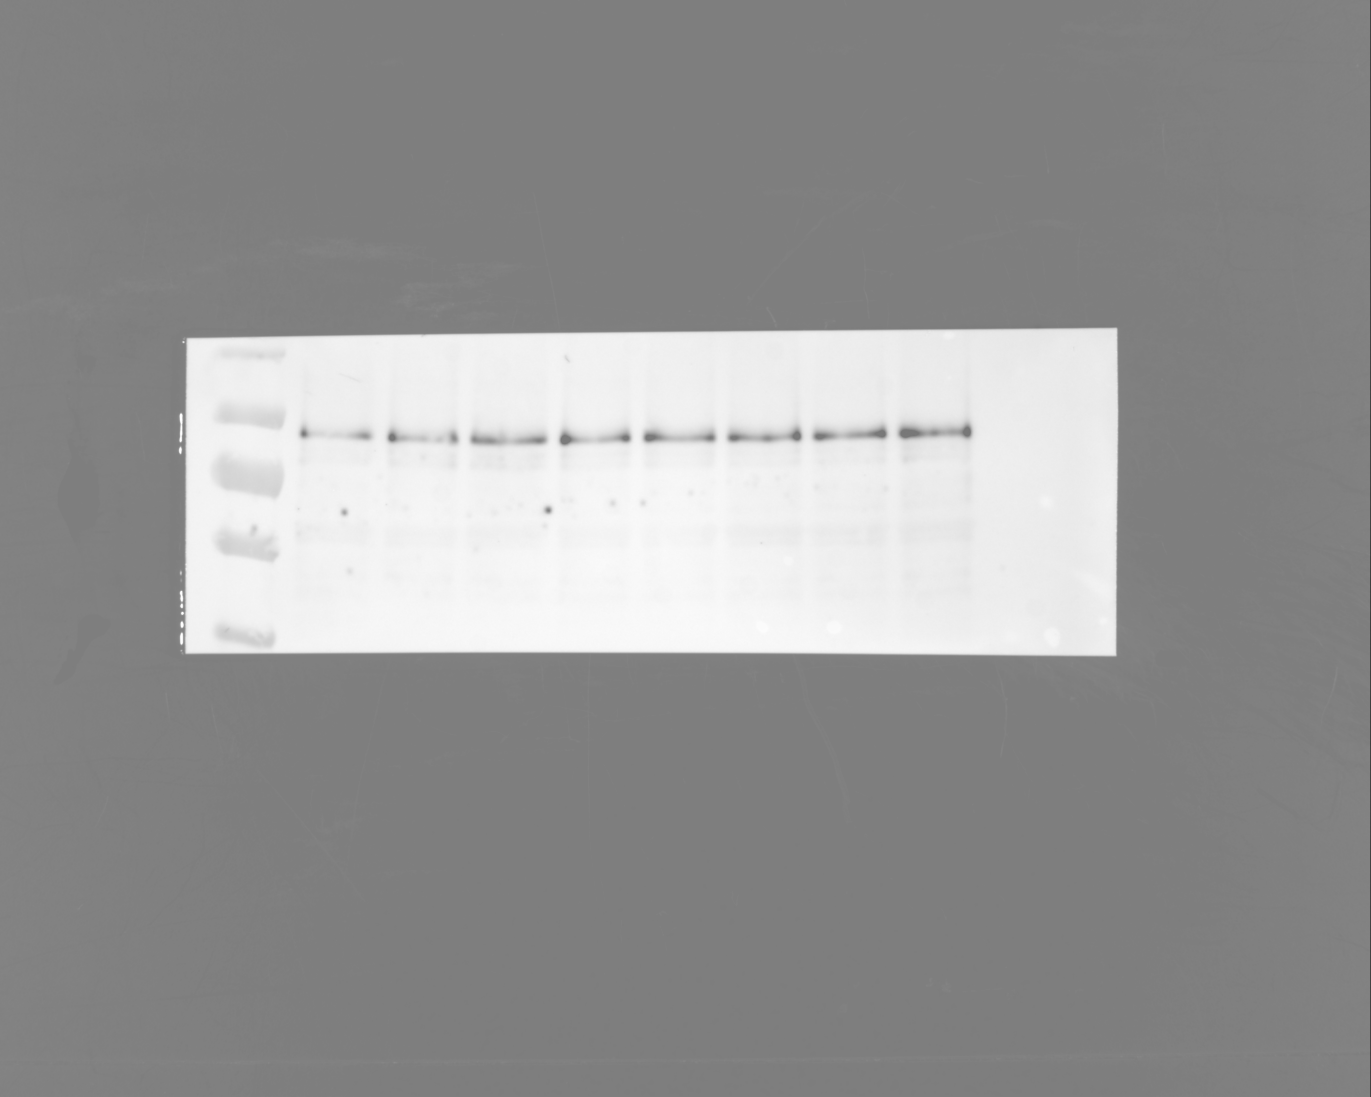
**

JPh1

Ponceau stain

**Figure 5**

**
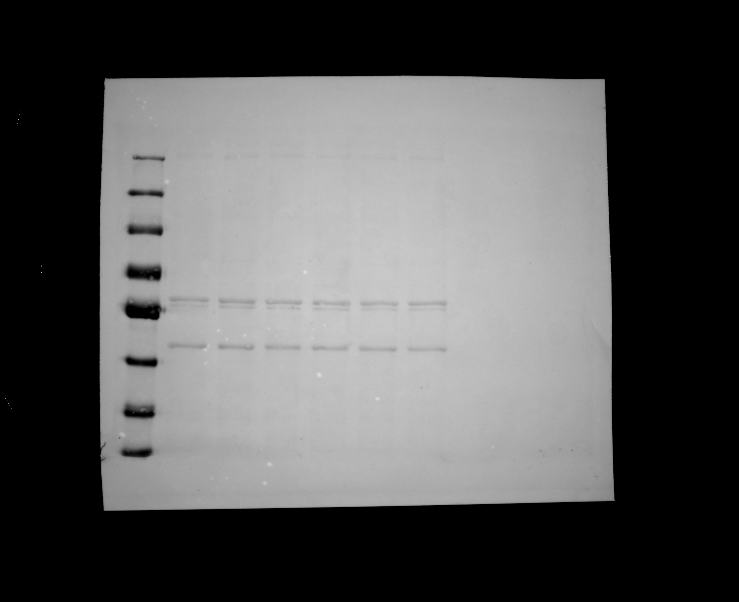

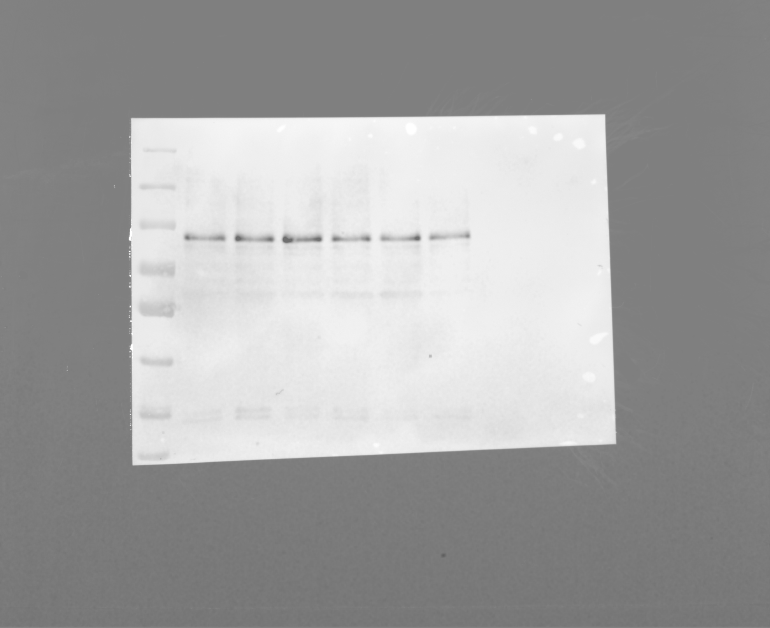
Panel D**

JPh1

Ponceau stain

**
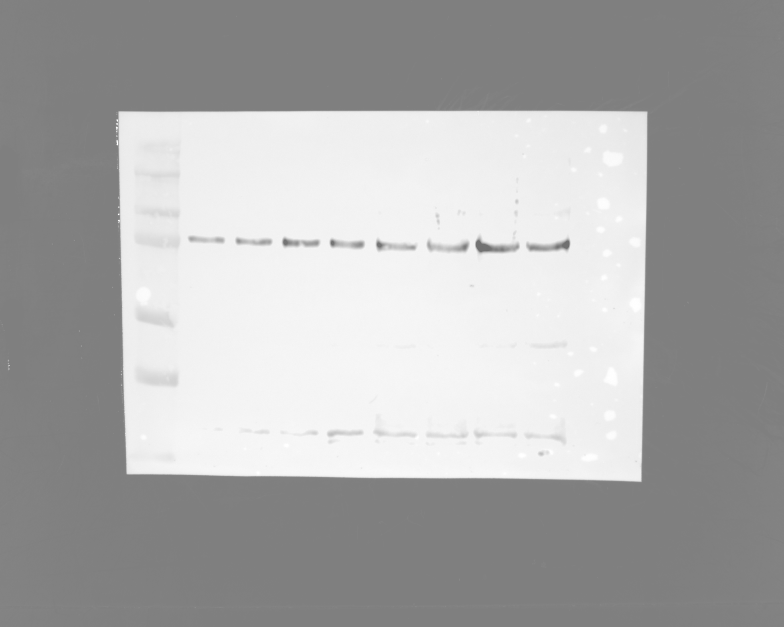
Panel F**

**
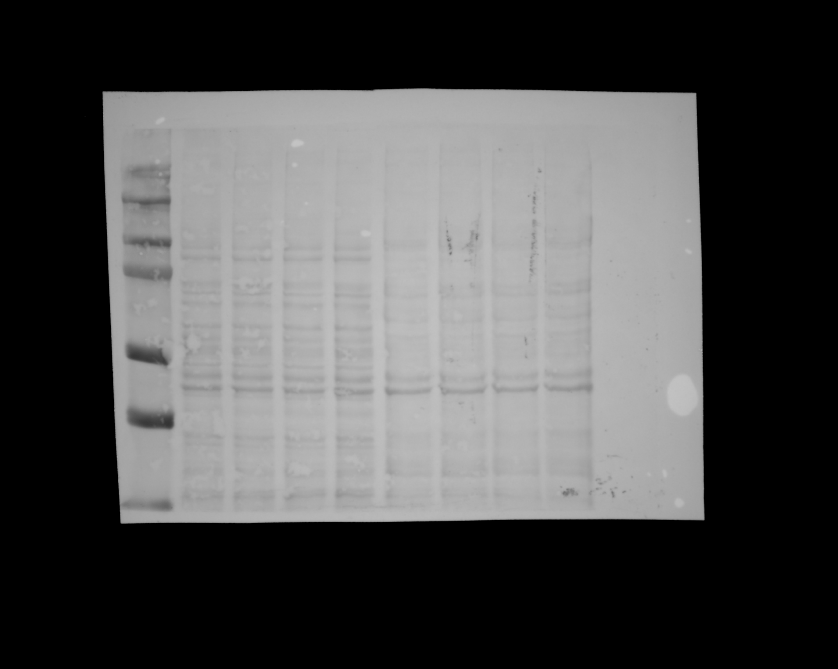

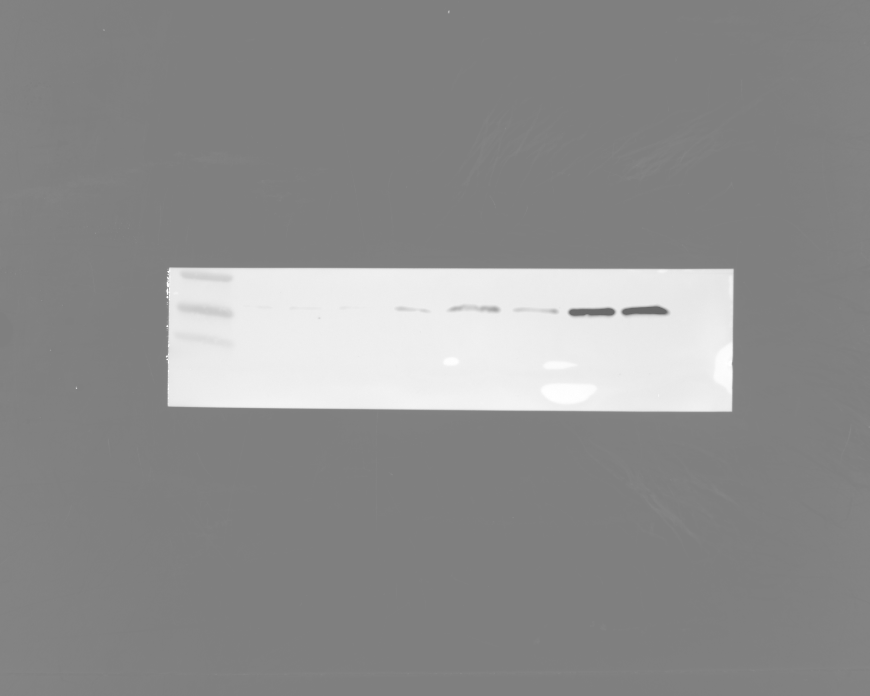

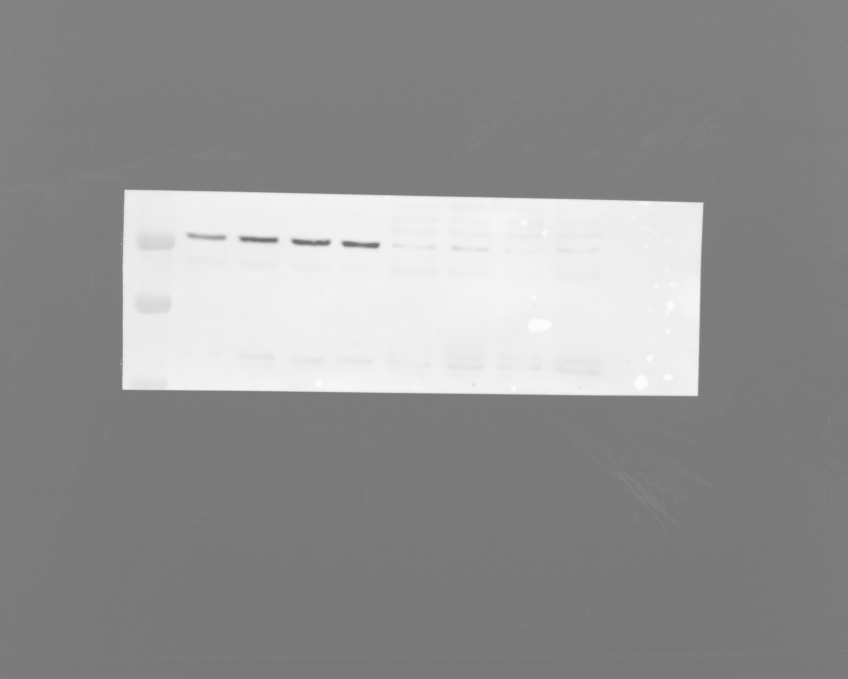
**

JPh1

Tubulin

Histone

Ponceau stain

**
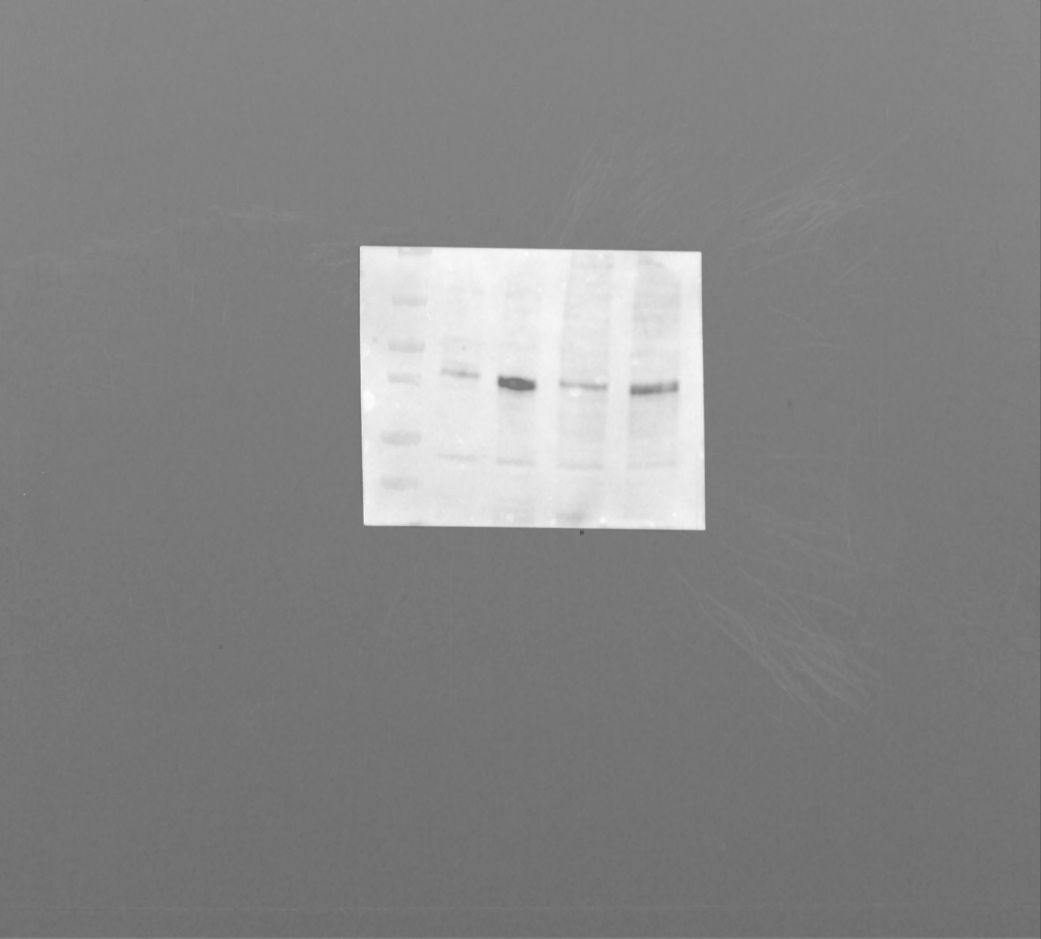
Panel K**

**
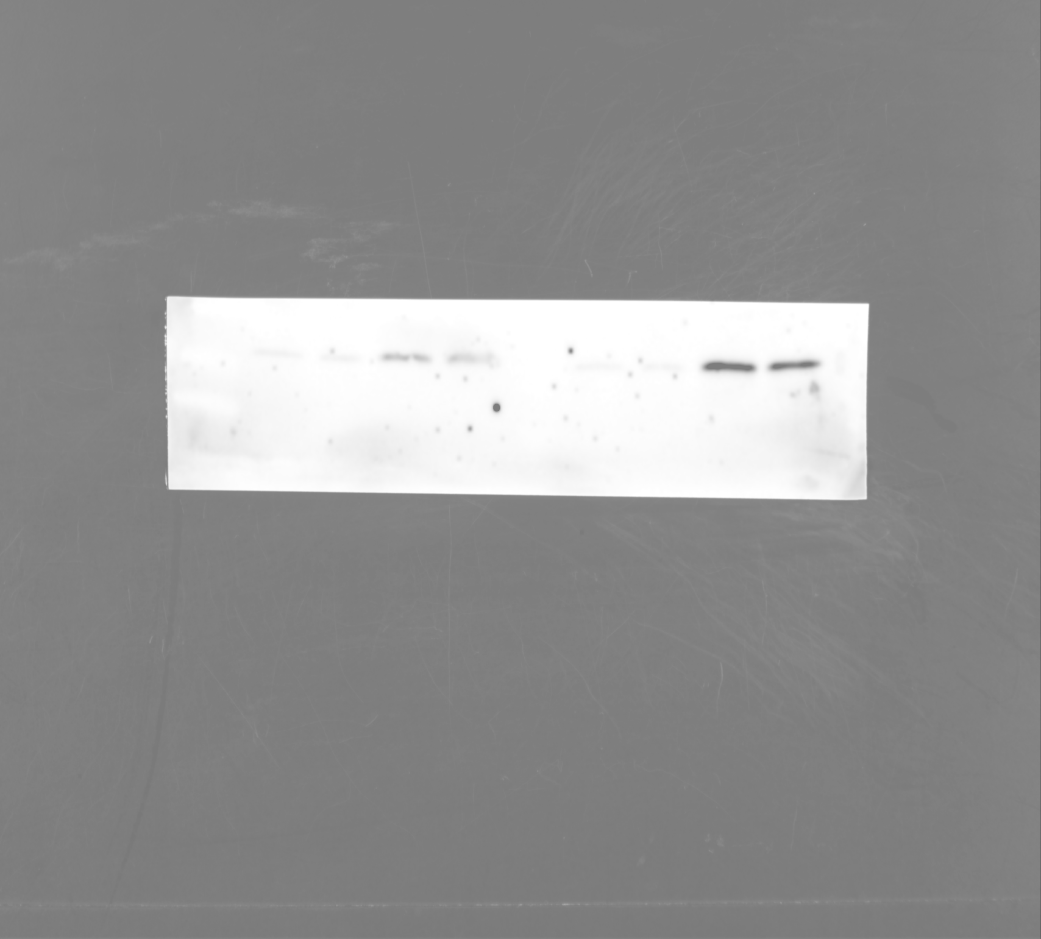

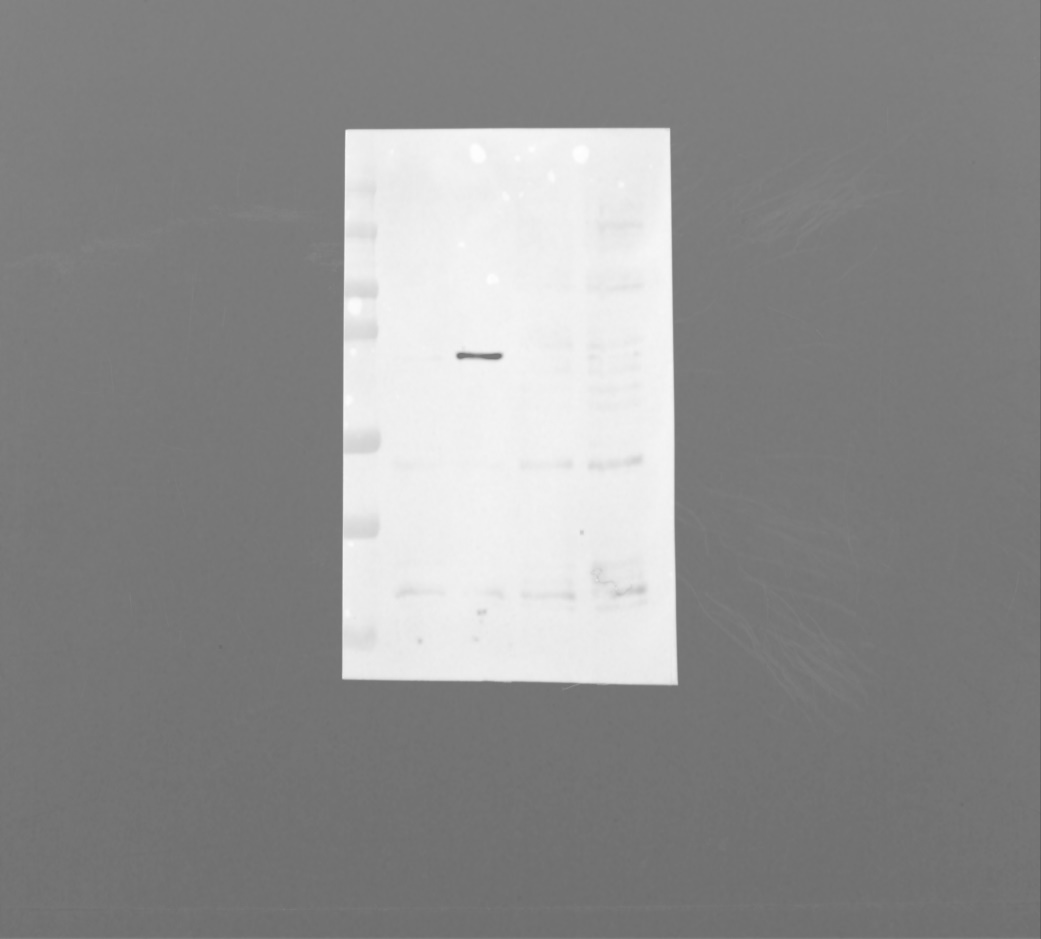
**JP

JPh1

HSP70

Histone

**
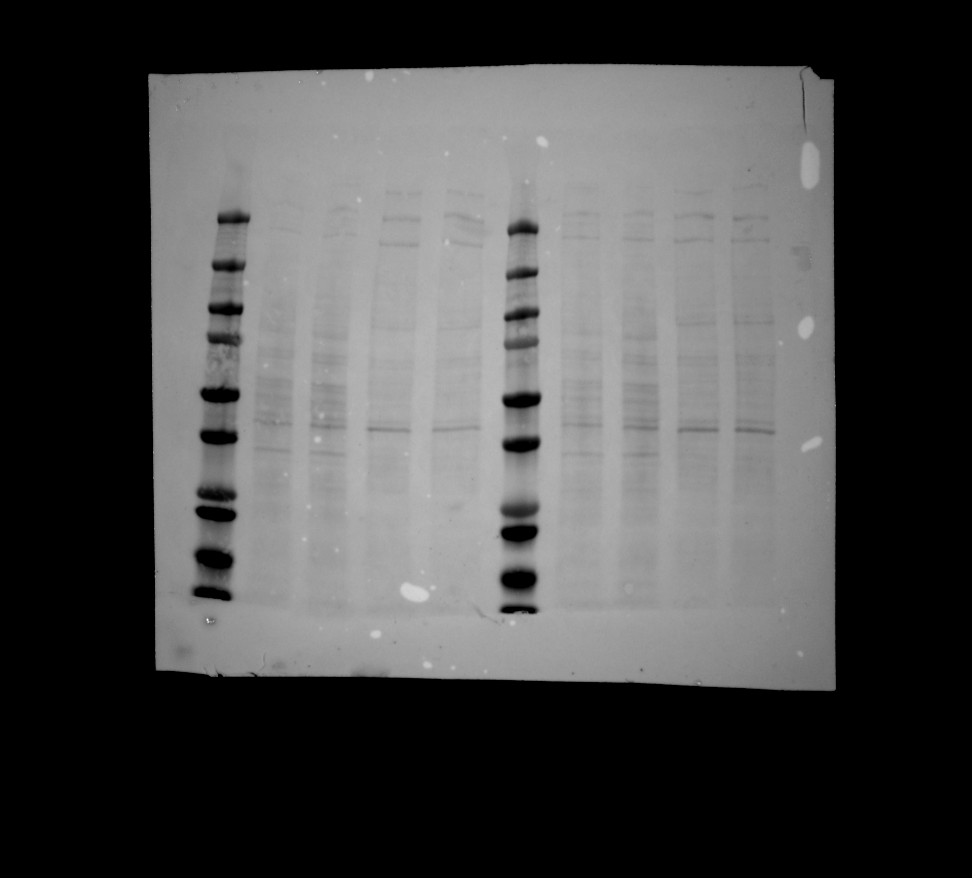
**

Ponceau stain

**Figure 6**

**
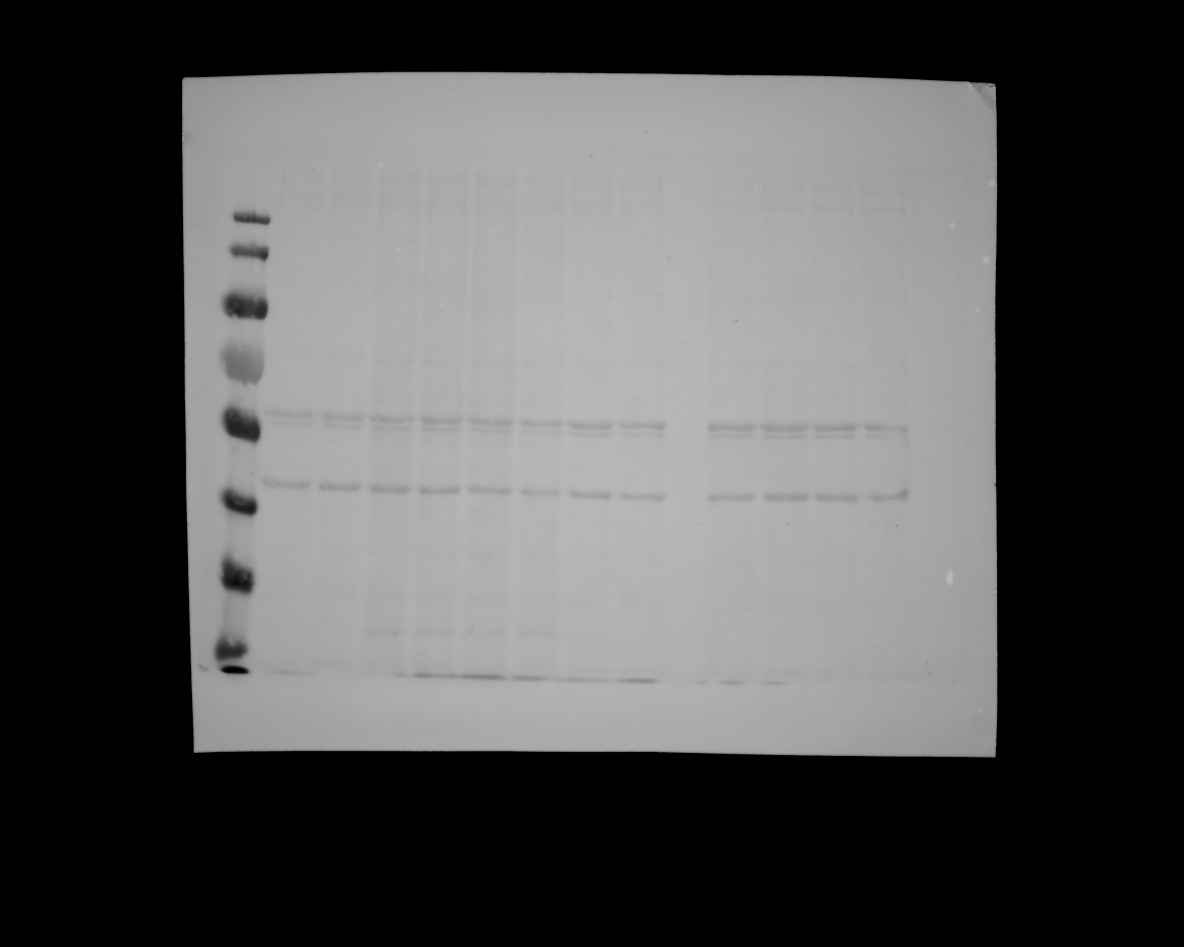

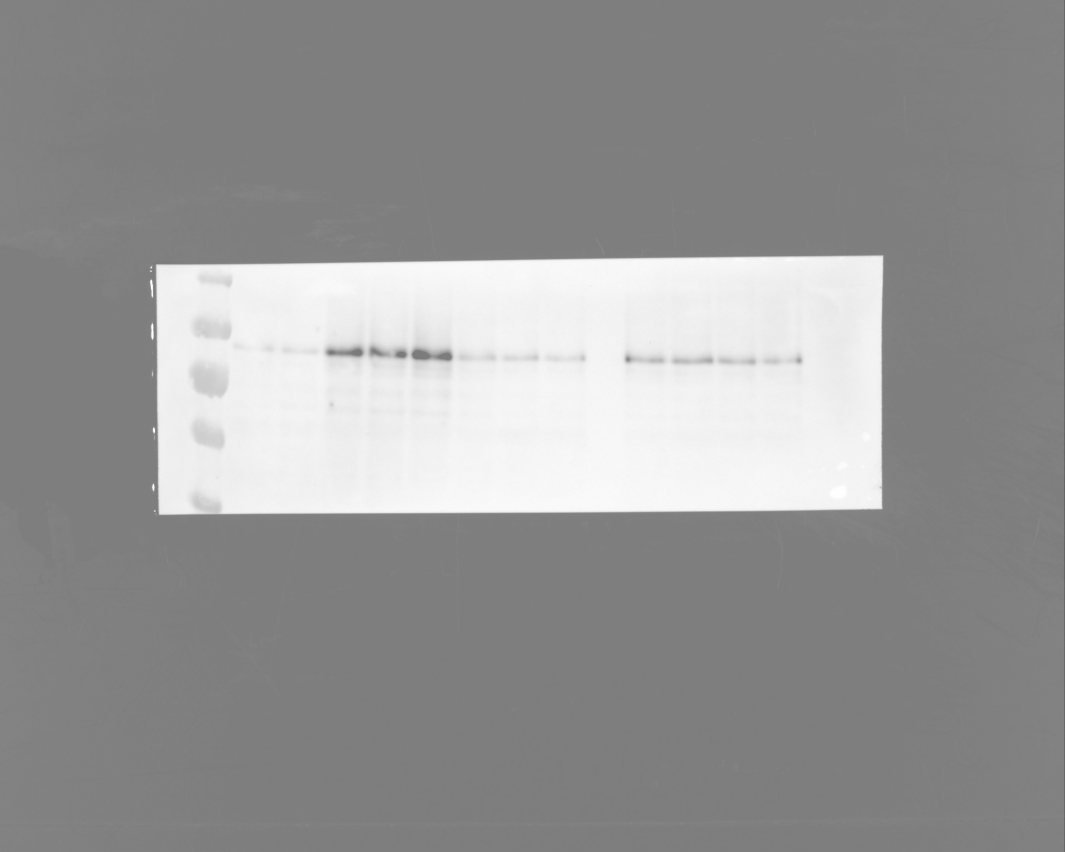
Panel A**

JPh1

Ponceau stain

**Figure 7**

**Panel G**

**
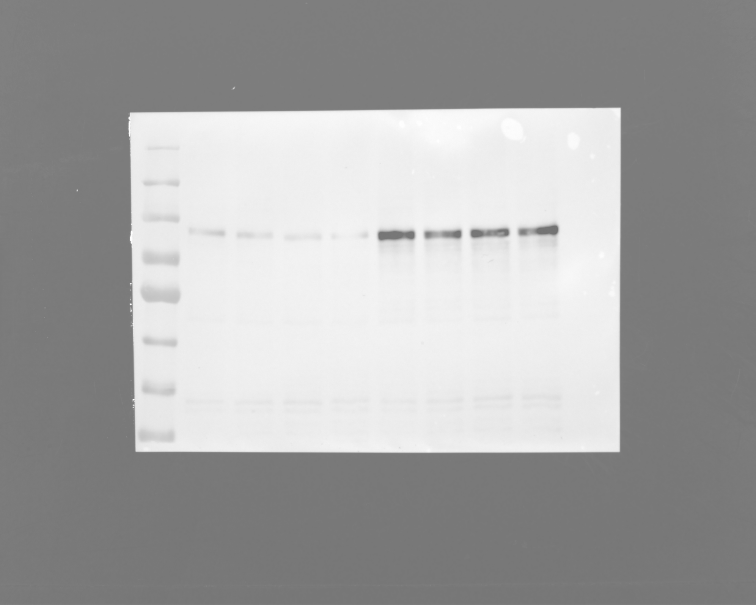

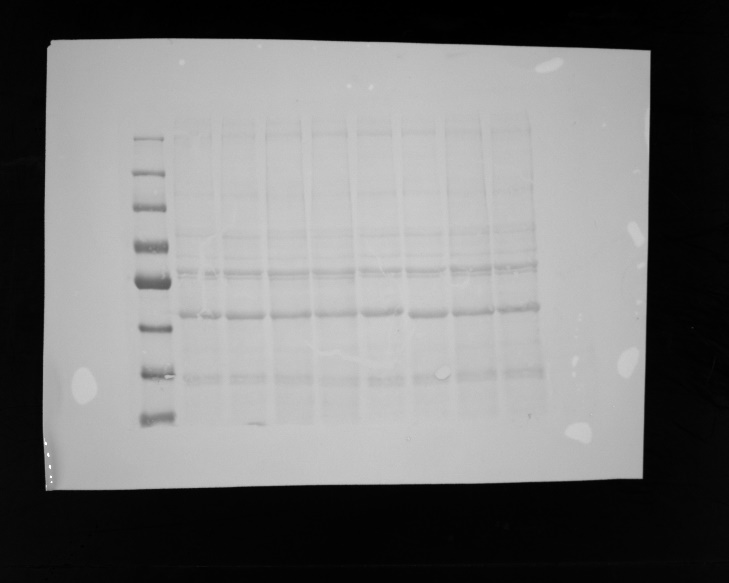

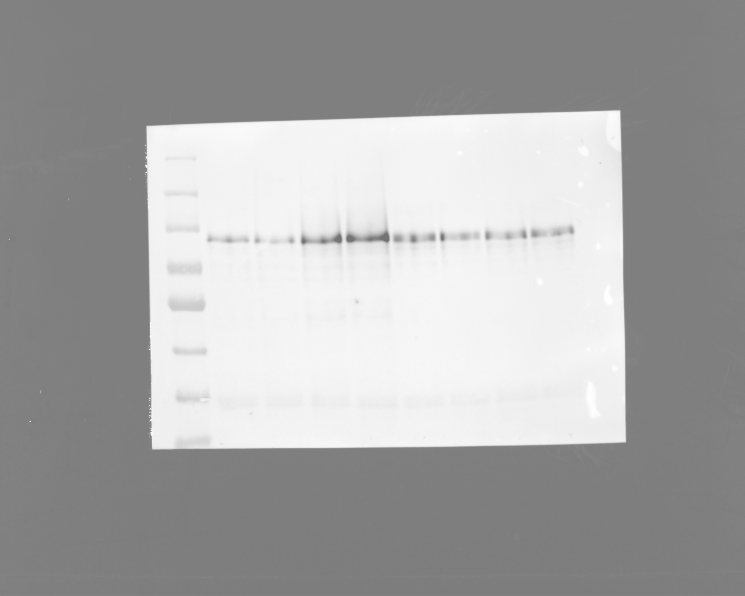
 Soluble Protein fractions**

JPh1 Ponceau stain

**Insoluble Protein fractions**

**
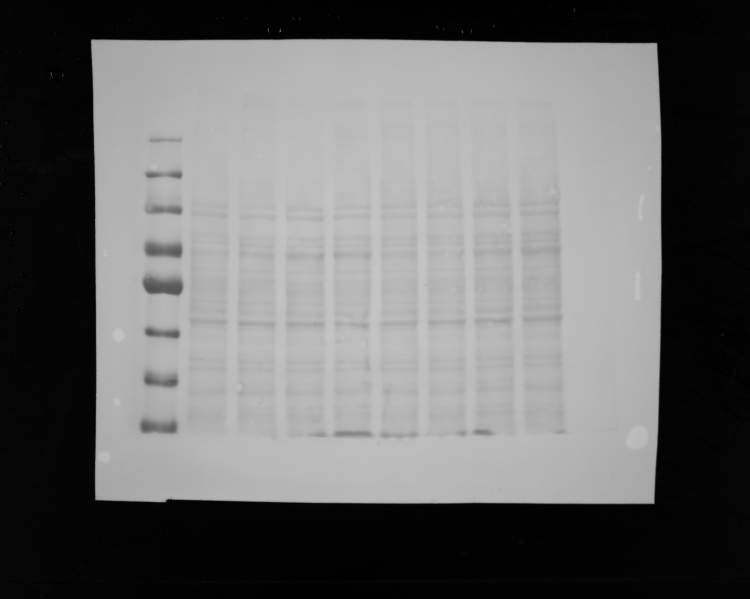
** JPh1 Ponceau stain

Supplemental Figure S1


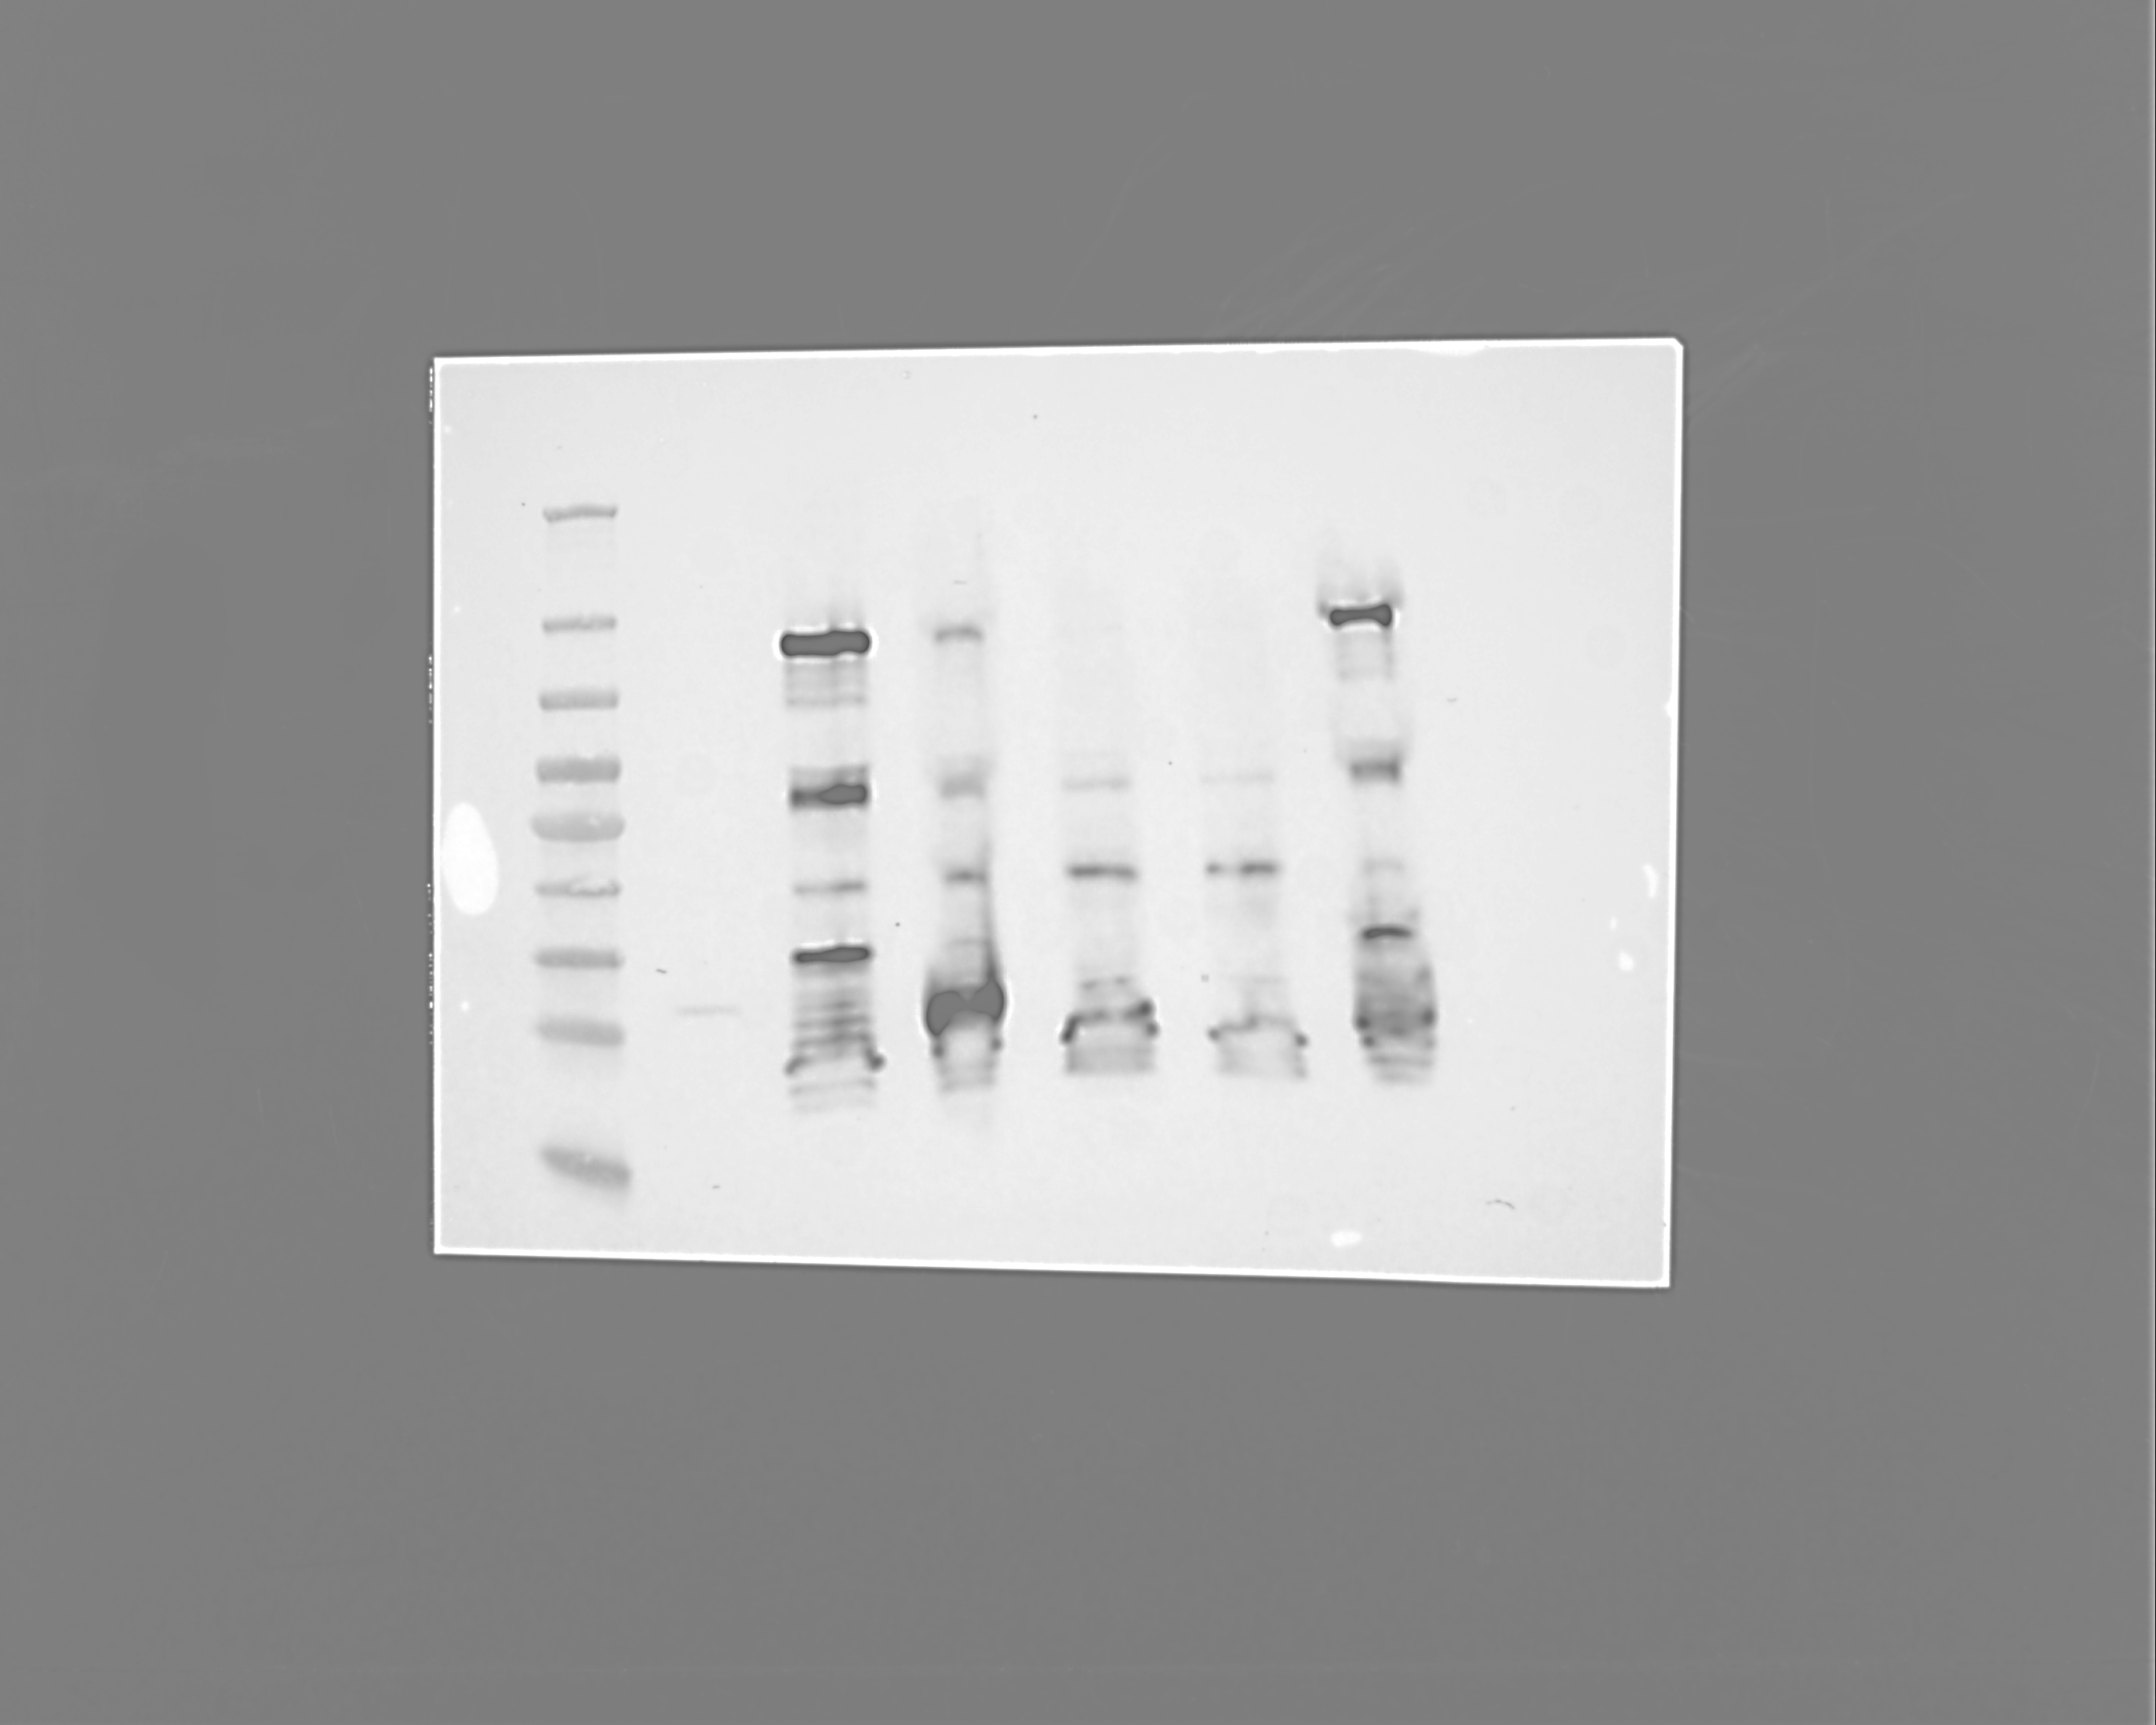
 FLAG


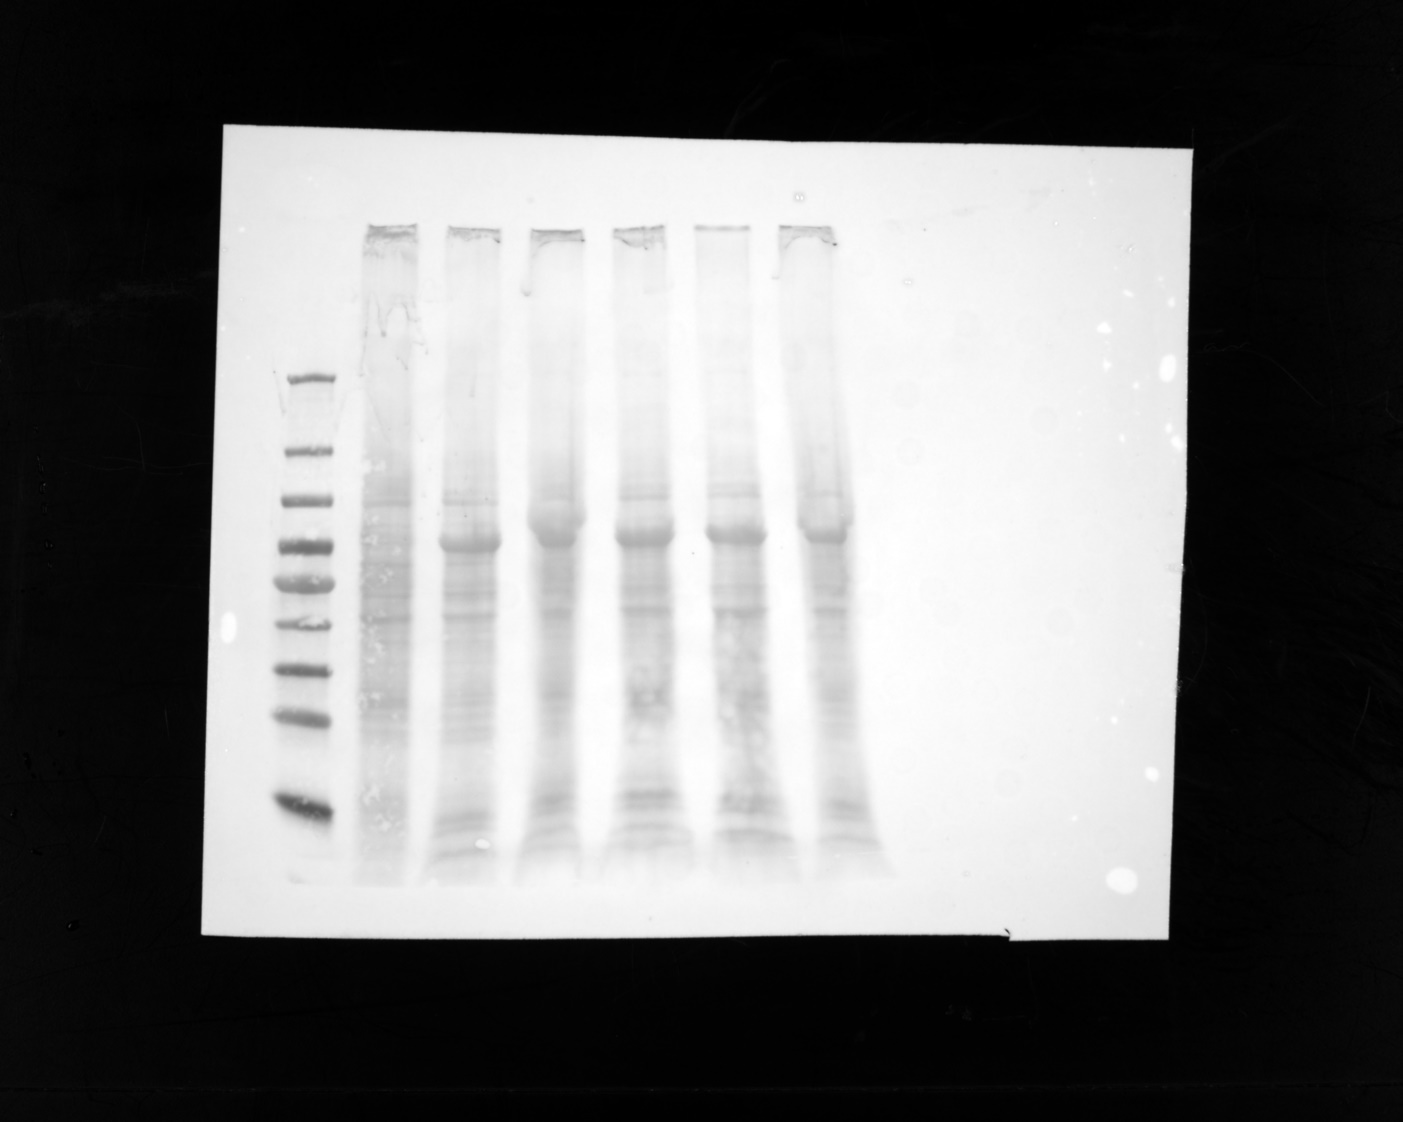


Ponceau stain
