# Supplementary material for: Calpain Mediated Proteolysis of Junctophilin-1 Produces an Aggregation Prone C-Terminal Fragment in Skeletal Muscle
Source: Research Square preprint supplement (doi:10.21203/rs.3.rs-8663093/v1), 2026-02-03
Supplement: Supplementary file 2 [file db69da75bc13ee1f70f7466a.docx]

|  | Cleavage Position (aa) | Peptide Sequence | GPS-CCD Score |
| --- | --- | --- | --- |
| 1 | 240 | SISSKRSSVR|SDAA | 1.481 |
| 2 | 233 | RKSESKSSIS|SKRS | 1.402 |
| 3 | 484 | SPASSPKPLK|KQNP | 1.307 |
| 4 | 478 | SPKHSHSPAS|SPKP | 1.234 |
| 5 | 582 | SSQSSSALVH|KPSA | 1.215 |
| 6 | 234 | KSESKSSISS|KRSS | 1.174 |
| 7 | 167 | PLRTSLASLR|SEQS | 1.171 |
| 8 | 581 | GSSQSSSALV|HKPS | 1.141 |
| 9 | 237 | SKSSISSKRS|SVRS | 1.139 |
| 10 | 370 | EGAQRAAAMA|RTKV | 1.092 |
| 11 | 236 | ESKSSISSKR|SSVR | 1.057 |
| 12 | 495 | QNPSSGARLN|QDKR | 1.049 |
| 13 | 604 | VTKPVAKESK|AEPK | 1.033 |
| 14 | 477 | ASPKHSHSPA|SSPK | 1.022 |
| 15 | 242 | SSKRSSVRSD|AAMS | 1.008 |

**Table S1.**

**Figure S1**


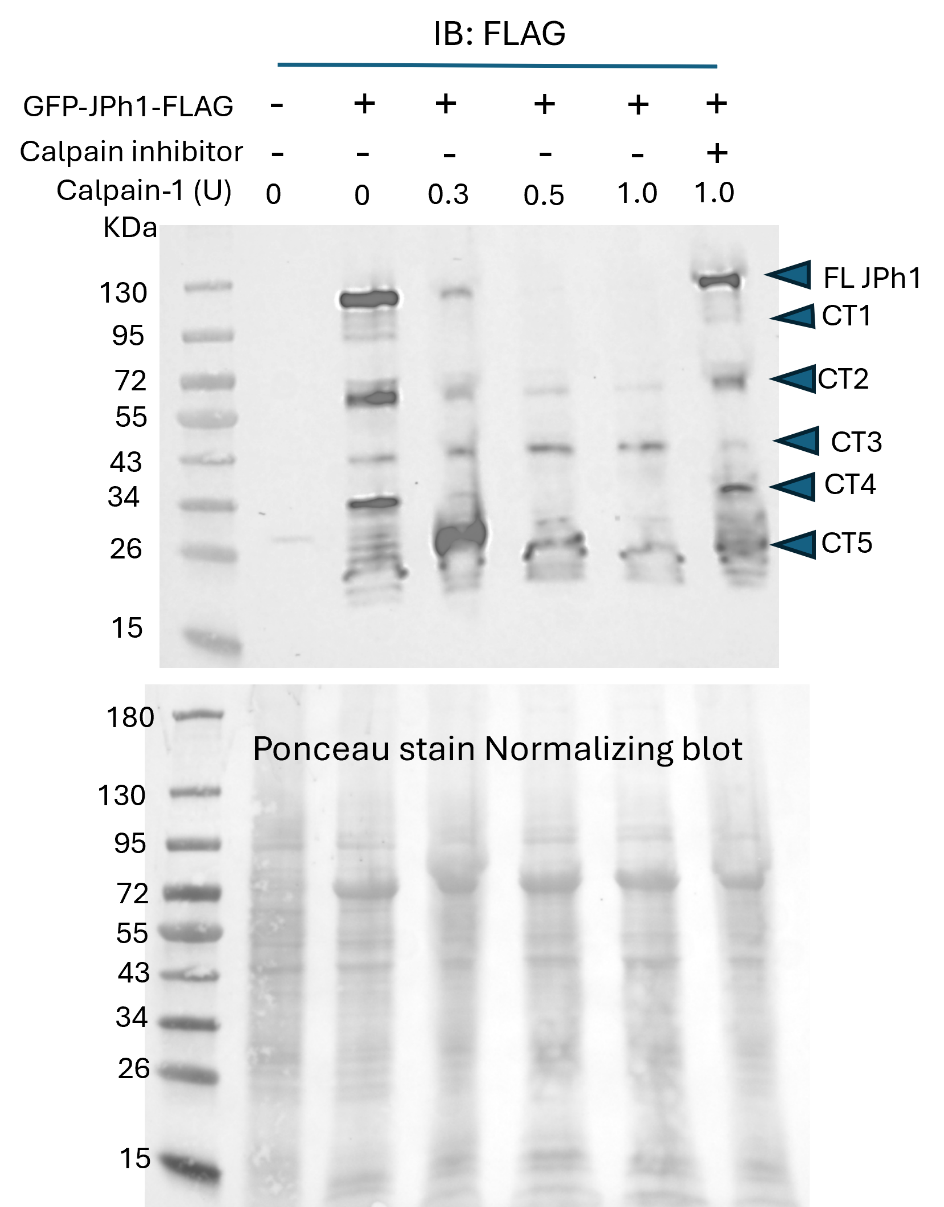


**Figure S2**


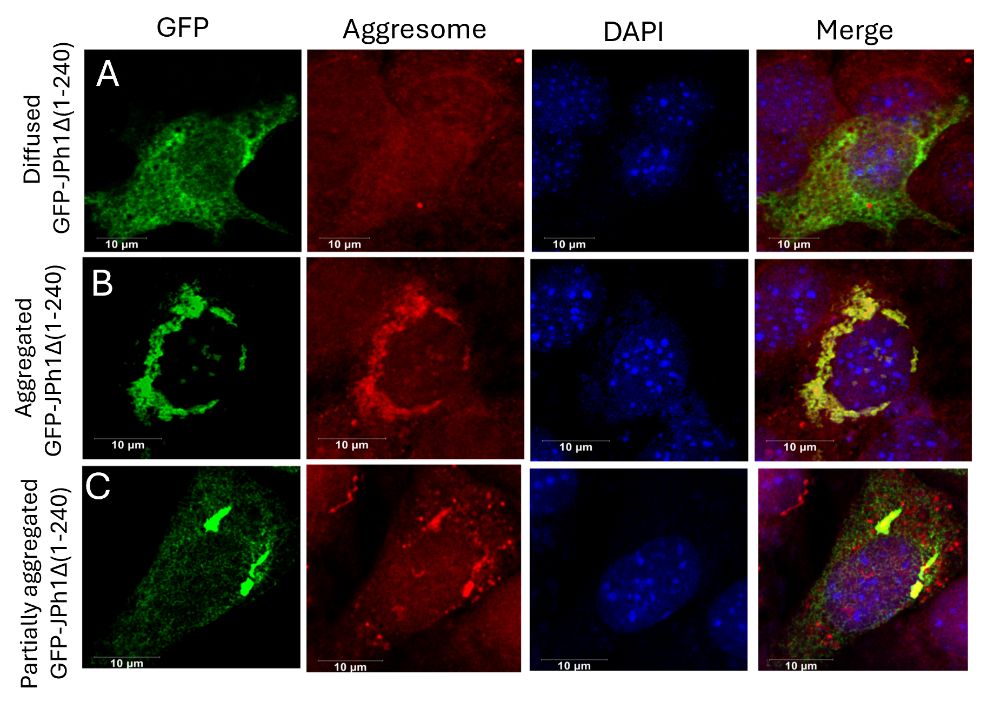


**Figure S3**


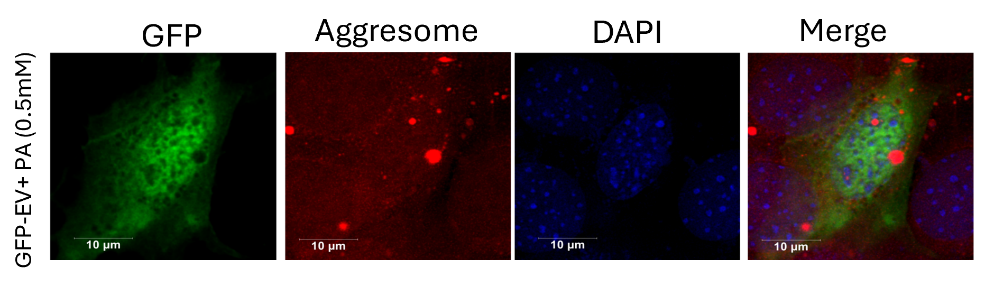


**Supplemental table and figures legends**

**Table S1. In silico prediction of calpain cleavage sites in JPh1.** The top 15 predicted calpain cleavage sites in Junctophilin-1 (JPh1) were identified using the GPS-CCD (Group-based Prediction System for Calpain Cleavage Detection) algorithm and ranked by predicted cleavage score. Cleavage sites are denoted by a vertical bar (|) within the peptide sequence window. Several high-confidence cleavage sites cluster within the N-terminal region surrounding residues 233–240, consistent with experimental identification of the ~44-kDa C-terminal JPh44 fragment.

**Figure S1. Calpain-dependent proteolytic cleavage of GFP–JPh1–FLAG in vitro.** Dual-tagged GFP–JPh1–FLAG is expressed in HEK293 cells for 48 h, after which cell lysates are subjected to in vitro calpain proteolysis. Western blot analysis using an anti-FLAG antibody reveals distinct C-terminal JPh1 cleavage fragments generated at increasing calpain-1 concentrations and in the presence or absence of a calpain inhibitor. Ponceau S staining of the membrane demonstrates uniform protein loading.

**Figure S2. Basal subcellular distribution and aggregation of GFP-JPH1Δ1–240 in C2C12 myoblasts.** (A–C) Confocal images of C2C12 myoblasts expressing GFP-JPH1Δ1–240 under basal conditions demonstrate heterogeneous subcellular localization and aggregation states. Shown are GFP fluorescence (green), Proteostat aggresome dye (red), nuclei (blue), and merged images. Three representative patterns are observed: (A) completely diffuse GFP-JPH1Δ1–240, (B) predominantly aggregated protein, and (C) a mixed diffuse and aggregated localization. Aggregated, but not diffuse, cytosolic GFP-JPH1Δ1–240 colocalizes with Proteostat dye, indicating the formation of misfolded protein aggregates.

**Figure S3. GFP empty vector does not form aggregates in C2C12 myoblasts.** Confocal images of C2C12 myoblasts expressing a GFP-tagged empty vector following palmitic acid (PA) treatment show diffuse cytosolic and nuclear GFP fluorescence without evidence of punctate aggregation. GFP fluorescence (green), Proteostat aggresome dye (red), nuclei (blue), and merged images are shown, indicating a lack of GFP colocalization with Proteostat dye under PA-treated conditions.
